# Supplementary material for: Drivers of COVID-19 Outcomes in Long-Term Care Facilities Using Multi-Level Analysis: A Systematic Review
Source: MDPI journal article supplement (doi:10.3390/healthcare12070807), 2024-04-08
Supplement: s1 [file s1]

**Table S4. Individual factors related to COVID-19 related deaths.**

|                                     |                                                                                                                                                                                                                                                                                                                                                                                                                                                                                                                                                                                                                                                                                                                                                                                                                                                                                                                                                                                                                                                                                                                                                                                                                                                                                                                                                                                                                                                                                                                                                                                                                                                                                                                                                                                                                                                                                                                                                                                                                                                                                                                                                                               |
|-------------------------------------|-------------------------------------------------------------------------------------------------------------------------------------------------------------------------------------------------------------------------------------------------------------------------------------------------------------------------------------------------------------------------------------------------------------------------------------------------------------------------------------------------------------------------------------------------------------------------------------------------------------------------------------------------------------------------------------------------------------------------------------------------------------------------------------------------------------------------------------------------------------------------------------------------------------------------------------------------------------------------------------------------------------------------------------------------------------------------------------------------------------------------------------------------------------------------------------------------------------------------------------------------------------------------------------------------------------------------------------------------------------------------------------------------------------------------------------------------------------------------------------------------------------------------------------------------------------------------------------------------------------------------------------------------------------------------------------------------------------------------------------------------------------------------------------------------------------------------------------------------------------------------------------------------------------------------------------------------------------------------------------------------------------------------------------------------------------------------------------------------------------------------------------------------------------------------------|
| <b>Socio-demographic background</b> | <p>Greater <b>age</b> was significantly associated with death within 30 days after a positive COVID-19 test [24,53,59,101,103,115].</p> <p>Mortality was significantly higher among the older &amp; oldest-old, (“oldest old” defined as those aged 80 or over and while "older" is commonly used to describe individuals in the age range of 65 to 80.) [24,29,33,46,51,58,60,75,98];and residents who survived COVID-19 were more likely to be of younger age [46]. The higher risk of mortality was significantly higher among those ≥ 80 years old compared to 65–79 years old at all 7, 30, and 90 days[55].</p> <p>The odds ratio of death for those aged 90 years or older was 2.14-2.94 compared to younger residents, falling within the range of 65 to 79 years.[101,103]. A one-year increase in the average age of residents was associated with a 0.3% higher COVID-19 mortality percentage (<math>P &lt; 0.01</math>)[102], and every 10-year increase in age increased the risk of death by 1.33 fold (95% CI 1.23– 1.45)[32], Older age groups of residents with COVID-19 had significantly higher odds of 30-day all-cause mortality compared with those less than 65 years old [the older, the higher odds) [68]. One study reported 22.7% of COVID-19 cases died, of which 24.8% were COVID-19-related deaths and found the adjusted incidence rate for older age was significantly 4% higher than younger for all-cause resident mortality[66].</p> <p><b>Male sex</b> was at higher risk [59,62,101,103] and was significantly linked with COVID-19-related deaths compared to females [20,24,29,32,46,51,52,54,58,60,98,103]. A significantly higher hazard rate for death within 30 days for men ranged from 58- 69% in two studies [24,68]while being female was significantly associated with a lower risk of mortality within 7, 30, and 90 days after COVID-19 diagnosis[55]. In an adjusted hazard ratio model, a significantly higher probability (32%) was also evident for men than women (aHR, 1.32; 95% CI, 1.29-1.35); [101].</p> <p>A higher score on the <b>social engagement level</b> was a predictor of lower mortality risk [29].</p> |
| <b>Condition-specific factors</b>   | <p><b>Cognitive deterioration</b> was linked to an elevated likelihood of COVID-19-related fatalities, with odds ranging from 1.28 to 1.68 and hazard ratios ranging from 1.34 to 1.45[20,29,32,33,59,98,101] at 90 days [55,115]. Individuals with Alzheimer's disease and related dementias had 33.4 excess deaths per 100,000 in comparison to those without these conditions [86].</p> <p>Higher <b>comorbidity/ Charlson Comorbidity Index</b> in general [24,52,55,58,98]and longer duration of co-existent comorbidities [29] were associated with death. High complexity was associated with a higher risk of death within 30 days after COVID-19 diagnosis[55].</p> <p>Chronic disease, including heart failure/cardiovascular disease [32,55,60,68,101], hypertension [60,81,110] , end-stage disease [24], diabetes [101,103,107], chronic kidney disease [68,101,103,107] at 90 days [55], ESRD [98], reduced kidney function [51], hepatopathy [59], complex chronic condition [60,62], respiratory disease [60,101], pneumonia [45,59], respiratory symptoms [20], immunocompromised status, inflammatory and immune factors and lower lymphocyte count [20,29,98], prior hospital contacts for respiratory illness [29], obesity [110], Parkinson's disease</p>                                                                                                                                                                                                                                                                                                                                                                                                                                                                                                                                                                                                                                                                                                                                                                                                                                                                                                |

|  |                                                                                                                                                                                                                                                                                                                                                                                                                                                                                                                                                                                                                                                                                                                                                                                                                                                                                                                |
|--|----------------------------------------------------------------------------------------------------------------------------------------------------------------------------------------------------------------------------------------------------------------------------------------------------------------------------------------------------------------------------------------------------------------------------------------------------------------------------------------------------------------------------------------------------------------------------------------------------------------------------------------------------------------------------------------------------------------------------------------------------------------------------------------------------------------------------------------------------------------------------------------------------------------|
|  | <p>[51], bowel incontinence [58], and auditory impairment [58], depression [101], GDS <math>\geq 6</math> (had almost five times higher probability) [116] hallucinations/ aggressive behavior [101], history of COPD and emphysema [107] (with seven times more probability) [116] were all associated with a higher number of deaths than not having those conditions; except for cancer, for which divergent findings were identified [68,101], and for obesity within 90 days after COVID-19 diagnosis [55]</p>                                                                                                                                                                                                                                                                                                                                                                                            |
|  | <p>Residents with multiple <b>symptoms</b> generally had the highest mortality risk [107]. Symptoms linked to mortality were fever [20,58,59,103], fatigue [49], confusion [58], hypoxia/ respiratory insufficiency [49,58,103], dyspnea and stupor and refusal of oral intake [59], pneumonia [45,59], and tachycardia [103],</p>                                                                                                                                                                                                                                                                                                                                                                                                                                                                                                                                                                             |
|  | <p><b>Laboratory tests</b> identifying lower hemoglobin concentration, lymphocyte count, serum albumin, and more elevated potassium and glomerular filtration rate (GFR) were all associated with an increased likelihood of mortality [29]. Kidney function as an independent predictor of COVID-19 mortality was studied using an estimated glomerular filtration rate (eGFR) and identified the risk of death ranged from 1.4 times higher for the group with an eGFR 60-89 to 2.3 times higher for the group with an eGFR <math>&lt;15</math> compared with the group with an eGFR <math>&gt;90</math> [108]. A lower mortality risk was also associated with a higher total HDL cholesterol ratio, hemoglobin, lymphocyte count, glomerular filtration rate, platelet count and total iron binding capacity [29]. The higher mortality risk is more likely for higher iron saturation and urate [29].</p> |
|  | <p>Poor <b>nutrition</b> (high risk 7.6%, med risk 8.6%) and <b>dehydration</b> (high risk 2.4%, low risk 2.4%) were associated with a higher risk of death [29].</p>                                                                                                                                                                                                                                                                                                                                                                                                                                                                                                                                                                                                                                                                                                                                          |
|  | <p>While a high <b>BMI</b> was associated with a high risk of infection, mortality was significantly increased among those with a low BMI [46,101] compared with a BMI of 18.5 to 25 [101].</p> <p>Conversely, survivors of COVID-19 were more likely to have normal BMI [46].</p>                                                                                                                                                                                                                                                                                                                                                                                                                                                                                                                                                                                                                             |
|  | <p>Increased <b>dependency levels</b> and worse activities of daily living (ADL) scores [2] detected from instruments such as the Barthel index [20,46,54,116], Tinetti scale [46], Scheda di Osservazione Intermedia dell'Assistenza" (SOSIA) frailty classification [46], or acuity index among minorities residents [110] were associated with increased mortality [44,54,103,110,113].</p> <p>Conversely, residents who survived COVID-19 were more likely to have better ADL scores [46].</p> <p>With the increasing <b>level of care needed</b>, functional impairment [32,101] or severe disability [56], the chance of death statistically significantly increased [63,113].</p>                                                                                                                                                                                                                       |
|  | <p>The presence of <b>frailty</b> (defined based on the items used in the Multidimensional Prognostic Index [MPI], the Frailty, and Frail-VIG index) and Pre-frail condition were significantly related to a greater hazard and odd ratio [24,116] and a statistically significantly increased probability of COVID-19-related death [44,46,105,115,116]. The proportion of death significantly increased along with the increase in the frailty severity (16.7% in prefrail, 22.2% in moderately frail, and 50.0% in frail) [105]. Females with high frailty levels (SOSIA) accounted for 73% of all the deaths [45]. Residents who died from COVID-19 had lower handgrip strength but not statistically significant [23].</p>                                                                                                                                                                                |
|  | <p><b>Co-existent medications:</b></p>                                                                                                                                                                                                                                                                                                                                                                                                                                                                                                                                                                                                                                                                                                                                                                                                                                                                         |

|  |                                                                                                                                                                                                                                                                                                                                                                                                                                                                                                                                                                                                                                                                                                                                                                                                                                                                                                                                                                                                                                                                                                                                                                                                                                                                                                                                                                                                                                                                                       |
|--|---------------------------------------------------------------------------------------------------------------------------------------------------------------------------------------------------------------------------------------------------------------------------------------------------------------------------------------------------------------------------------------------------------------------------------------------------------------------------------------------------------------------------------------------------------------------------------------------------------------------------------------------------------------------------------------------------------------------------------------------------------------------------------------------------------------------------------------------------------------------------------------------------------------------------------------------------------------------------------------------------------------------------------------------------------------------------------------------------------------------------------------------------------------------------------------------------------------------------------------------------------------------------------------------------------------------------------------------------------------------------------------------------------------------------------------------------------------------------------------|
|  | <p>Collectively, the total number of medications was significantly associated with 30-day COVID-related mortality[52].</p> <p>The impact of medications individually was reported as follows:</p> <p><i>Hydroxychloroquine therapy</i> was associated with a reduced likelihood of death [46], but was subsequently refuted [127].</p> <p><i>Hydroxychloroquine and azithromycin</i> were associated with a higher likelihood of survival [20].</p> <p><i>Statin</i> intake was associated with an increased likelihood of death [58]. <i>Vitamin D</i> supplementation was associated with a reduced likelihood of death [46].</p> <p><i>Antipsychotic use</i> were significantly associated with threefold greater odds[116].</p> <p><i>Benzodiazepines</i> was associated with 2.23 times higher odds but an unadjusted model [116].</p> <p><i>Hyperpolypharmacy</i> (≥10 medications) was associated with 2.25 times higher odds but an unadjusted model [116].</p> <p><i>Proton pump inhibitor</i> was associated with increased mortality (p=0.004) [52].</p> <p><i>Antiplatelet therapy</i> was associated with a decrease in the rate of death ( p=0.026) [52].</p> <p><i>Anticoagulation</i> lowered the risk of mortality [46] by 30% (RR 0.70 95% CI 0.51–0.96) [32]. The use of antiplatelets and anticoagulants was significantly associated with lower odds (17%) of 30-day mortality compared to those not using anticoagulants (aOR 0.83, 95% CI 0.71-0.97) [68].</p> |
|  | <p>A more prolonged <b>duration of stay in LTCFs</b> was a predictor for a lower mortality risk [29].</p> <p>A COVID-19-related <b>hospitalization</b> was associated with a statistically significantly greater risk of death [58]. The number of residents previously admitted or readmitted to the hospital for COVID-19 treatment per week [113], hospitalization for acute myocardial infarction [98] or for respiratory infection since 2000 and the number of ED visits with a respiratory diagnosis in the prior year [29] were associated with risk of death. Palliative medical management was also associated with higher risk of mortality at 6 months [49].</p>                                                                                                                                                                                                                                                                                                                                                                                                                                                                                                                                                                                                                                                                                                                                                                                                          |
|  | <p><b>COVID-19 rates</b> in LTCFs were significantly associated with higher mortality among residents in LTCFs[66].</p>                                                                                                                                                                                                                                                                                                                                                                                                                                                                                                                                                                                                                                                                                                                                                                                                                                                                                                                                                                                                                                                                                                                                                                                                                                                                                                                                                               |
