# Supplementary material for: Drivers of COVID-19 Outcomes in Long-Term Care Facilities Using Multi-Level Analysis: A Systematic Review
Source: MDPI journal article supplement (doi:10.3390/healthcare12070807), 2024-04-08
Supplement: s1 [file s1]

**Table S2.** The methodological quality assessment of the included studies.

| First Author    | Year | QAS*<br>Level | First Author                        | Year | QAS*<br>Level | First Author        | Year | QAS*<br>Level |
|-----------------|------|---------------|-------------------------------------|------|---------------|---------------------|------|---------------|
| Rabilloud       | 2023 | 2             | Gorges                              | 2021 | 1             | Panagiotou          | 2021 | 2             |
| Abrams          | 2020 | 3             | Harrington                          | 2020 | 2             | Peckeu-Abboud       | 2022 | 2             |
| Adler           | 2022 | 2             | He                                  | 2020 | 2             | Piet                | 2021 | 2             |
| Agoües          | 2021 | 1             | Hege                                | 2021 | 2             | Preus               | 2022 | 2             |
| Aguilar-Palacio | 2022 | 2             | Heras                               | 2021 | 2             | Rabilloud           | 2022 | 2             |
| Akhtar          | 2021 | 2             | Hill                                | 2022 | 3             | Rutten              | 2020 | 1             |
| Arendse         | 2022 | 2             | Houben                              | 2023 | 2             | Sacco               | 2020 | 2             |
| Arienti         | 2021 | 3             | Hua                                 | 2022 | 1             | San Roman           | 2023 | 2             |
| Arnedo-Pena     | 2022 | 1             | Ibrahim                             | 2021 | 2             | Scanferla           | 2023 | 1             |
| Bagchi          | 2021 | 3             | Iyanda                              | 2022 | 2             | Shallcross          | 2021 | 1             |
| Booij           | 2022 | 2             | Kain                                | 2021 | 2             | Shen                | 2022 | 2             |
| Brown           | 2021 | 2             | Kennelly                            | 2021 | 2             | Shi                 | 2020 | 2             |
| Bui             | 2020 | 2             | Khairat                             | 2021 | 2             | Soldevila           | 2021 | 2             |
| Cai             | 2021 | 2             | Kim                                 | 2022 | 2             | Stall               | 2020 | 2             |
| Cangiano        | 2020 | 2             | Kumar                               | 2021 | 2             | Sugg,               | 2021 | 1             |
| Cazzoletti      | 2021 | 2             | Lane                                | 2022 | 1             | Suñer               | 2021 | 2             |
| Chatterjee      | 2020 | 3             | Lee                                 | 2021 | 2             | Tang                | 2020 | 2             |
| Chen            | 2021 | 2             | Lee                                 | 2022 | 2             | Tarteret            | 2021 | 2             |
| Chen            | 2020 | 1             | Levy-Storms                         | 2022 | 2             | Telleria            | 2022 | 1             |
| Cooper          | 2021 | 1             | Li                                  | 2022 | 1             | Thorsness           | 2022 | 2             |
| Corvol          | 2022 | 2             | Li,Temkin-Greener,<br>Cen, et al.   | 2020 | 1             | Torres              | 2022 | 2             |
| Cox             | 2023 | 1             | Li, Temkin-Greener,<br>Shan, et al. | 2020 | 2             | Travers             | 2021 | 2             |
| Cronin          | 2022 | 1             | Longo                               | 2022 | 2             | Unruh               | 2020 | 2             |
| Dean            | 2020 | 2             | Lord                                | 2021 | 2             | Veronese            | 2021 | 2             |
| Emmerson        | 2022 | 2             | Lu                                  | 2021 | 2             | Vijh                | 2021 | 2             |
| Engeda          | 2023 | 2             | Mas Romero                          | 2020 | 2             | Visser              | 2023 | 2             |
| Escriba         | 2022 | 1             | Mattingly                           | 2021 | 2             | Weech-<br>Maldonado | 2021 | 1             |
| Figuerola       | 2020 | 2             | McGarry                             | 2021 | 1             | Williams            | 2021 | 2             |
| Fisman          | 2020 | 2             | Mehta                               | 2021 | 2             | Young               | 2023 | 2             |
| Frigotto        | 2023 | 2             | Meis-Pinheiro                       | 2021 | 2             | Zhang               | 2022 | 1             |
| Gilman          | 2021 | 3             | Morciano                            | 2021 | 2             | Zhu                 | 2022 | 1             |
| Gopal           | 2021 | 2             | Olson                               | 2022 | 2             | Zimmerman           | 2021 | 2             |
| Gorges          | 2020 | 1             | Orlando                             | 2022 | 2             | Zunzunegui          | 2022 | 2             |

\* QAS= Quality assessment scores per the Joanna Briggs Institute's critical appraisal tools ranked the studies into three levels: High quality (Level 1): Studies that meet most or all of the criteria and demonstrates minimal potential for bias. Moderate quality (Level 2): Studies that meet some of the criteria or exhibits a moderate likelihood of bias. Low quality (Level 3): Studies that do not meet multiple criteria or exhibit a significant risk of bias.
