# Supplementary material for: Drivers of COVID-19 Outcomes in Long-Term Care Facilities Using Multi-Level Analysis: A Systematic Review
Source: MDPI journal article supplement (doi:10.3390/healthcare12070807), 2024-04-08
Supplement: s1 [file s1]

**Table S1.** Search strategies.

Searches were conducted in OVID MEDLINE, EMBASE, EBSCOhost CINAHL, and Wiley Cochrane Database of Systematic Reviews. The search results were limited to those published since 2022 and in English.

Below are the numbers of results retrieved from each database:

- MEDLINE: 499
- EMBASE: 636
- CINAHL: 163
- Cochrane Database of Systematic Reviews: 45

There are 961 results after deduplication.

Below are the search strategies.

| Ovid MEDLINE(R) ALL 1946 to May 22, 2023 |                                                                                                                                                                                                                                                                                                                                                                                                                                                    |         |
|------------------------------------------|----------------------------------------------------------------------------------------------------------------------------------------------------------------------------------------------------------------------------------------------------------------------------------------------------------------------------------------------------------------------------------------------------------------------------------------------------|---------|
| #                                        | Searches                                                                                                                                                                                                                                                                                                                                                                                                                                           | Results |
| 1                                        | exp Coronavirus/ or Coronavirus Infections/ or COVID-19/ or (covid or coronaviru* or corona viru* or ncov* or n-cov* or novel cov* or COVID-19 or COVID19 or COVID-2019 or COVID2019 or SARS-CoV-2 or SARSCoV-2 or SARSCoV2 or SARSCoV19 or SARS-Cov-19 or SARSCov-19 or SARSCoV2019 or SARS-Cov-2019 or SARSCov-2019 or severe acute respiratory syndrome coronaviru* or severe acute respiratory syndrome cov 2 or 2019 ncov or 2019ncov).kf,tw. | 377723  |
| 2                                        | Long-Term Care/ or residential facilities/ or assisted living facilities/ or homes for the aged/ or nursing homes/ or intermediate care facilities/ or skilled nursing facilities/                                                                                                                                                                                                                                                                 | 77885   |
| 3                                        | (long term care or assisted living or continuing care or extended care or ((residential or nursing or senior* or old age or geriatric* or elder*) adj (lodge* or facilit* or home* or residence*))).kf,tw.                                                                                                                                                                                                                                         | 68605   |
| 4                                        | 2 or 3                                                                                                                                                                                                                                                                                                                                                                                                                                             | 106494  |
| 5                                        | disease outbreaks/ or disease hotspot/                                                                                                                                                                                                                                                                                                                                                                                                             | 91085   |
| 6                                        | mortality/ or "cause of death"/ or fatal outcome/ or hospital mortality/ or survival rate/                                                                                                                                                                                                                                                                                                                                                         | 386626  |
| 7                                        | (outbreak* or case rate* or positiv* rate*).kf,tw.                                                                                                                                                                                                                                                                                                                                                                                                 | 174212  |
| 8                                        | (mortalit* or death rate* or fatality rate* or "cause* of death" or death cause* or fatal outcome* or survival rate* or survival time*).kf,tw.                                                                                                                                                                                                                                                                                                     | 1278682 |
| 9                                        | or/5-8                                                                                                                                                                                                                                                                                                                                                                                                                                             | 1667006 |
| 10                                       | 1 and 4 and 9                                                                                                                                                                                                                                                                                                                                                                                                                                      | 1260    |
| 11                                       | limit 10 to (english language and yr="2022 -Current")                                                                                                                                                                                                                                                                                                                                                                                              | 499     |

**EBSCOhost CINAL**

| #  | Query                                                                                                                                                                                                                                                                                                                                                                                                                                                                                                                                                                                                                                                                                                                                                                                                                                                                                                                                                                                    | Limiters/Expanders                                                     | Results |
|----|------------------------------------------------------------------------------------------------------------------------------------------------------------------------------------------------------------------------------------------------------------------------------------------------------------------------------------------------------------------------------------------------------------------------------------------------------------------------------------------------------------------------------------------------------------------------------------------------------------------------------------------------------------------------------------------------------------------------------------------------------------------------------------------------------------------------------------------------------------------------------------------------------------------------------------------------------------------------------------------|------------------------------------------------------------------------|---------|
| S1 | ( (MH "COVID-19") OR (MH "SARS-CoV-2") ) OR TI ( covid or coronavirus* or corona viru* or coronavirinae* or covid2019 or covid19 or covid-19 or nCoV* or n-CoV* or novel CoV* or 2019-nCoV* or 2019nCoV or 19nCov or hCoV* or h-Cov* or 2019-hCoV* or 2019hCoV* or 19 hCoV* or SARS-CoV-2 or SARSCoV2 or SARSCov-2 or SARS-CoV-19 or SARSCoV19 or SARSCoV-19 or SARS-Cov-2019 or SARSCoV2019 or SARSCoV-2019 or "severe acute respiratory syndrome CoV 2" or "severe acute respiratory syndrome coronavirus 2" ) OR AB ( covid or coronavirus* or corona viru* or coronavirinae* or covid2019 or covid19 or covid-19 or nCoV* or n-CoV* or novel CoV* or 2019-nCoV* or 2019nCoV or 19nCov or hCoV* or h-Cov* or 2019-hCoV* or 2019hCoV* or 19 hCoV* or SARS-CoV-2 or SARSCoV2 or SARSCov-2 or SARS-CoV-19 or SARSCoV19 or SARSCoV-19 or SARS-Cov-2019 or SARSCoV2019 or SARSCoV-2019 or "severe acute respiratory syndrome CoV 2" or "severe acute respiratory syndrome coronavirus 2" ) | Expanders - Apply equivalent subjects<br>Search modes - Boolean/Phrase | 127,876 |
| S2 | (MH "Long Term Care") OR (MH "Residential Facilities") OR (MH "Nursing Homes+") OR (MH "Skilled Nursing Facilities") OR (MH "Assisted Living")                                                                                                                                                                                                                                                                                                                                                                                                                                                                                                                                                                                                                                                                                                                                                                                                                                           | Expanders - Apply equivalent subjects<br>Search modes - Boolean/Phrase | 58,093  |
| S3 | TI ( long term care or assisted living or continuing care or extended care or ((residential or nursing or senior* or old age or geriatric* or elder*) N (lodge* or facilit* or home* or residence*)) ) OR AB ( long term care or assisted living or continuing care or extended care or ((residential or nursing or senior* or old age or geriatric* or elder*) N (lodge* or facilit* or home* or residence*)) )                                                                                                                                                                                                                                                                                                                                                                                                                                                                                                                                                                         | Expanders - Apply equivalent subjects<br>Search modes - Boolean/Phrase | 23,704  |
| S4 | S2 OR S3                                                                                                                                                                                                                                                                                                                                                                                                                                                                                                                                                                                                                                                                                                                                                                                                                                                                                                                                                                                 | Expanders - Apply equivalent subjects<br>Search modes - Boolean/Phrase | 67,818  |

|     |                                                                                                                                                                                                                                                                                              |                                                                                                                                          |         |
|-----|----------------------------------------------------------------------------------------------------------------------------------------------------------------------------------------------------------------------------------------------------------------------------------------------|------------------------------------------------------------------------------------------------------------------------------------------|---------|
| S5  | (MH "Disease Outbreaks") OR (MH "Disease Hotspot")                                                                                                                                                                                                                                           | Expanders - Apply equivalent subjects<br>Search modes - Boolean/Phrase                                                                   | 41,873  |
| S6  | TI ( outbreak* or case rate* or positiv* rate* ) OR AB ( outbreak* or case rate* or positiv* rate* )                                                                                                                                                                                         | Expanders - Apply equivalent subjects<br>Search modes - Boolean/Phrase                                                                   | 32,300  |
| S7  | (MH "Cause of Death") OR (MH "Hospital Mortality") OR (MH "Mortality")                                                                                                                                                                                                                       | Expanders - Apply equivalent subjects<br>Search modes - Boolean/Phrase                                                                   | 66,706  |
| S8  | TI ( mortalit* or death rate* or fatality rate* or "cause* of death" or death cause* or fatal outcome* or survival rate* or survival time* ) OR AB ( mortalit* or death rate* or fatality rate* or "cause* of death" or death cause* or fatal outcome* or survival rate* or survival time* ) | Expanders - Apply equivalent subjects<br>Search modes - Boolean/Phrase                                                                   | 293,258 |
| S9  | S5 OR S6 OR S7 OR S8                                                                                                                                                                                                                                                                         | Expanders - Apply equivalent subjects<br>Search modes - Boolean/Phrase                                                                   | 372,132 |
| S10 | S1 AND S4 AND S9                                                                                                                                                                                                                                                                             | Expanders - Apply equivalent subjects<br>Search modes - Boolean/Phrase                                                                   | 593     |
| S11 | S1 AND S4 AND S9                                                                                                                                                                                                                                                                             | Limiters - Published Date: 20220101-20231231; English Language<br>Expanders - Apply equivalent subjects<br>Search modes - Boolean/Phrase | 163     |

#### Embase 1974 to 2023 Week 20

| # | Searches                                                                                                                                                                                                                                                                                                                                                                                                                                                                                                                                                           | Results |
|---|--------------------------------------------------------------------------------------------------------------------------------------------------------------------------------------------------------------------------------------------------------------------------------------------------------------------------------------------------------------------------------------------------------------------------------------------------------------------------------------------------------------------------------------------------------------------|---------|
| 1 | COVID-19/ or SARS-CoV-2/ or coronavirinae/ or betacoronavirus/ or Coronavirus infection/ or (covid or coronavirus* or corona viru* or coronavirinae* or covid2019 or covid19 or covid-19 or nCoV* or n-CoV* or novel CoV* or 2019-nCoV* or 2019nCoV or 19nCov or hCoV* or h-Cov* or 2019-hCoV* or 2019hCoV* or 19 hCoV* or SARS-CoV-2 or SARSCoV2 or SARSCov-2 or SARS-CoV-19 or SARSCoV19 or SARSCoV-19 or SARS-Cov-2019 or SARSCoV2019 or SARSCoV-2019 or "severe acute respiratory syndrome CoV 2" or "severe acute respiratory syndrome coronavirus 2").kw,tw. | 458595  |
| 2 | long term care/ or assisted living facility/ or nursing home/ or residential home/ or home for the aged/                                                                                                                                                                                                                                                                                                                                                                                                                                                           | 213113  |

|    |                                                                                                                                                                                                             |         |
|----|-------------------------------------------------------------------------------------------------------------------------------------------------------------------------------------------------------------|---------|
| 3  | (long term care or assisted living or continuing care or extended care or ((residential or nursing or senior* or old age or geriatric* or elder*) adj (lodge* or facilit* or home* or residence*))) .kf,tw. | 89692   |
| 4  | 2 or 3                                                                                                                                                                                                      | 240761  |
| 5  | disease hotspot/                                                                                                                                                                                            | 452     |
| 6  | (outbreak* or case rate* or positiv* rate*).kf,tw.                                                                                                                                                          | 206917  |
| 7  | mortality/ or all cause mortality/ or death toll/ or excess mortality/ or hospital mortality/ or mortality rate/                                                                                            | 1097946 |
| 8  | (mortalit* or death rate* or fatality rate* or "cause* of death" or death cause* or fatal outcome* or survival rate* or survival time*).kf,tw.                                                              | 1897126 |
| 9  | or/5-8                                                                                                                                                                                                      | 2351775 |
| 10 | 1 and 4 and 9                                                                                                                                                                                               | 2231    |
| 11 | limit 10 to (english language and yr="2022 -Current")                                                                                                                                                       | 771     |
| 12 | limit 11 to medline                                                                                                                                                                                         | 135     |
| 13 | 11 not 12                                                                                                                                                                                                   | 636     |

#### Wiley Cochrane Database of Systematic Reviews

| ID | Search                                                                                                                                                                                                                                                                                                                                                                                                                                                              | Results |
|----|---------------------------------------------------------------------------------------------------------------------------------------------------------------------------------------------------------------------------------------------------------------------------------------------------------------------------------------------------------------------------------------------------------------------------------------------------------------------|---------|
| #1 | [mh "coronavirus"] or [mh ^"coronavirus infections"] or [mh "COVID-10"] or (covid or ositive us* or corona viru* or ncov* or n-cov* or novel cov* or COVID-19 or COVID19 or COVID-2019 or COVID2019 or SARS-CoV-2 or SARSCoV-2 or SARSCoV2 or SARSCoV19 or SARS-Cov-19 or SARSCov-19 or SARSCoV2019 or SARS-Cov-2019 or SARSCov-2019 or severe acute respiratory syndrome ositive us* or severe acute respiratory syndrome cov 2 or 2019 ncov or 2019ncov):ti,ab,kw | 1523181 |
| #2 | [mh ^"long-term care"] or [mh ^"residential facilities"] or [mh ^"assisted living facilities"] or [mh ^"homes for the aged"] or [mh "nursing homes"]                                                                                                                                                                                                                                                                                                                | 2220    |
| #3 | (long term care or assisted living or continuing care or extended care or ((residential or nursing or senior* or old age or geriatric* or elder*) Next (lodge* or ositive* or home* or residence*))) :ti,ab,kw                                                                                                                                                                                                                                                      | 38911   |
| #4 | #2 or #3                                                                                                                                                                                                                                                                                                                                                                                                                                                            | 39153   |
| #5 | [mh ^"disease outbreaks"] or [mh ^"disease hotspot"]                                                                                                                                                                                                                                                                                                                                                                                                                | 280     |
| #6 | (outbreak* or case rate* or ositive* rate*):ti,ab,kw                                                                                                                                                                                                                                                                                                                                                                                                                | 25351   |

|     |                                                                                                                                                  |        |
|-----|--------------------------------------------------------------------------------------------------------------------------------------------------|--------|
| #7  | [mh ^"mortality"] or [mh "cause of death"] or [mh "fatal outcome"] or [mh "hospital mortality"] or [mh "survival rate"]                          | 20885  |
| #8  | (mortalit* or death rate* or fatality rate* or "cause* of death" or death cause* or fatal outcome* or survival rate* or survival time*):ti,ab,kw | 197445 |
| #9  | #5 or #6 or #7 or #8                                                                                                                             | 215531 |
| #10 | #1 and #4 and #9                                                                                                                                 | 8400   |
| #11 | Limit #8 to Cochrane Reviews                                                                                                                     | 473    |
| #12 | Limit #9 to Publication Date: 01/01/2022 to 05/23/2023                                                                                           | 45     |
