# Supplementary material for: Drivers of COVID-19 Outcomes in Long-Term Care Facilities Using Multi-Level Analysis: A Systematic Review
Source: MDPI journal article supplement (doi:10.3390/healthcare12070807), 2024-04-08
Supplement: s1 [file s1]

**Table S3. Individual factors related to outbreaks.**

|                                     |                                                                                                                                                                                                                                                                                                                                                                                                                                                                                                                                                                                                                                                                                                                                                                                                                                                                                                                                                                                                                                                                                                                                                                                                                                                                                                                                                                                                                                                                                                                                                                                                                                                                                                                                                                                                                                                                                                 |
|-------------------------------------|-------------------------------------------------------------------------------------------------------------------------------------------------------------------------------------------------------------------------------------------------------------------------------------------------------------------------------------------------------------------------------------------------------------------------------------------------------------------------------------------------------------------------------------------------------------------------------------------------------------------------------------------------------------------------------------------------------------------------------------------------------------------------------------------------------------------------------------------------------------------------------------------------------------------------------------------------------------------------------------------------------------------------------------------------------------------------------------------------------------------------------------------------------------------------------------------------------------------------------------------------------------------------------------------------------------------------------------------------------------------------------------------------------------------------------------------------------------------------------------------------------------------------------------------------------------------------------------------------------------------------------------------------------------------------------------------------------------------------------------------------------------------------------------------------------------------------------------------------------------------------------------------------|
| <b>Socio-demographic background</b> | <p><b>Age:</b> Older, rather than younger age [24,46,60,63,97,101,105,115] was associated with outbreaks.</p> <p>In one 500-bed long-term care facility, the outbreak was found to be more prevalent among younger older adult individuals in an unadjusted analysis model [105].</p> <p>In a study of an LTCF with predominantly frail older residents with significant neurocognitive disorders, a 100% likelihood of COVID-19 [Relative Risk (RR): 17, 95% Confidence Interval (CI): 2.5-113.8] was documented for:</p> <ul style="list-style-type: none"> <li>- residents younger than 90 (no age range provided) with dyspnea and falls,</li> <li>- residents older than 90 (no age range provided) with anorexia and</li> <li>- residents older than 90 (no age range provided) without anorexia but with altered consciousness [39].</li> </ul> <p><b>Sex:</b> Female was associated with a higher risk of infection and represented 75% of the COVID-19 population [45,56]. Examining shifts throughout 2020 and the initial months of 2021, a female sex (Relative Risk: 1.16, Confidence Interval: 1.07–1.25) was noted as a determinant for occurrences in LTCFs during the later phase of the pandemic (December-February 2021) [91].</p> <p>A significant association between male sex and outbreaks in a large academic LTCF [105] as well as with substantial outbreaks (positive cases &gt;10% of licensed beds) but in an unadjusted analysis (<math>p = 0.03</math>) [99].</p> <p>Concerning <b>socio-economic status</b>, the percentage of families below poverty level (RR: 1.15, CI: 1.05–1.26) was a predictor of COVID-19 cases in the mid-pandemic (September-December – 2020) period [91]</p>                                                                                                                                                                         |
| <b>Condition-specific factors</b>   | <p><b>Comorbid conditions</b>, including respiratory disease [60], peripheral vascular disease, hypertension, anemia [107], bowel incontinence [105], urinary incontinence [58], chronic kidney disease, asthma, and cancer [107] were associated with outbreaks. Diabetes was identified as having an association with COVID-19 outbreaks in certain studies [105,107]. However, in another study, this association was on the brink of statistical significance, with a <math>p</math>-value of 0.06 [116]. Those with stroke had 4.10 times the risk of symptomatic COVID-19 than those without stroke [57,105]. Residents with behavioural symptoms and cognitive deterioration/dementia also had a higher probability of infection [105,107]. In a study of 673 LTCFs, the odds of the positive test in LTCFs in which 50–74% of residents had dementia were 3.36 times compared to those with non-dementia residents. The odds increased to 4.54 times in facilities with more than 75% of residents with dementia[115].</p> <p>In a study of 15 LTCF, depression exhibited a connection with the outbreak and continued to show a notable correlation with a heightened risk of infection, even after adjusting for factors like age, gender, and the specific facility [107]. However, another study carried out across four LTCFs observed that among participants diagnosed with dementia and having a GDS (Global Deterioration Scale) score of <math>\geq 6</math>, those who accounted for the sample were found to be 35% less susceptible (adjusted odds ratio [aOR]: 0.65, <math>p &lt; 0.037</math>) to SARS-CoV-2 infection. The researchers postulated that the substantial presence of residents with dementia (68%) could have influenced these findings. [116].</p> <p><b>Smokers</b> were more likely to be infected by COVID-19 (<math>p</math>-value=0.008) [107].</p> |

|  |                                                                                                                                                                                                                                                                                                                                                                                                                                                                                                                                                                                                                                                  |
|--|--------------------------------------------------------------------------------------------------------------------------------------------------------------------------------------------------------------------------------------------------------------------------------------------------------------------------------------------------------------------------------------------------------------------------------------------------------------------------------------------------------------------------------------------------------------------------------------------------------------------------------------------------|
|  | <p><b>Co-existent medications</b>, including antidementia drugs (AChEI/Memantine) and antipsychotic medications, were more likely to be taken by those without COVID-19 symptoms [58]. It was felt unlikely that these medications protected against viral infection, and rather that residents with dementia are pauci-symptomatic, and frequently report few, if any, symptoms [58]</p>                                                                                                                                                                                                                                                        |
|  | <p><b>Seroprevalence level:</b> LTCFs where individuals exhibited intermediate seroprevalence (with 50%-70% of individuals testing seropositive for IgG response against the SARSCoV-2 nucleoprotein), as well as LTCFs with high seroprevalence (where more than 70% of individuals were seropositive), experienced reductions of 55% and 78% respectively in the risk of outbreaks when compared to LTCFs with low seroprevalence individuals[61].</p>                                                                                                                                                                                         |
|  | <p>Increasing <b>BMI</b> was associated with about 6% higher risk of infection [101], while several other studies explored it with no significant associations.</p>                                                                                                                                                                                                                                                                                                                                                                                                                                                                              |
|  | <p><b>Resident dependency</b>, as measured by the Barthel scores [46,54] and Tinetti (Performance Oriented Mobility) scores [46], showed an association between increased dependency and a greater risk for infection [46].</p> <p>The need for more care and having greater staff contacts (e.g., residents with severe cognitive or functional impairment or with a feeding tube, intravenous line, or catheter), higher medical pre-existing condition, a higher level of needs, problems with mobility, and disability in basic activities of daily living (BADL) were associated with a higher risk of infection [22,58,63,72,101,105].</p> |
|  | <p>A higher <b>Frailty Index</b> (greater degree of frailty) was associated with outbreaks among residents [24] and COVID-19 symptoms manifestation [58]. Almost a 30% increase in the odds of a positive test for severely frail residents (1.29 95% CIs 1.05–1.59) was reported compared to mildly, moderately or not frail individuals [115].</p>                                                                                                                                                                                                                                                                                             |
|  | <p>Higher <b>instruments score</b>, including the Resident Assessment Instrument – Minimum Data Set (RAI-MDS), Changes in Health, End-stage disease and Signs and Symptoms (CHESS) was more likely to be associated with outbreaks [24].</p>                                                                                                                                                                                                                                                                                                                                                                                                     |
|  | <p>An estimated poor <b>life expectancy</b> was associated with a greater than 6% increase in the risk of infection [101].</p>                                                                                                                                                                                                                                                                                                                                                                                                                                                                                                                   |
|  | <p>Lower <b>duration of stay (&lt;100 days) in LTCFs</b> was found to be significant for the likelihood of large outbreaks (number of cases &gt; 10% of licensed beds) even after adjustment analysis [99].</p>                                                                                                                                                                                                                                                                                                                                                                                                                                  |
|  | <p><b>Hospitalization</b> in general [58] and the number of residents previously hospitalized /weekly average number of residents [113] were also associated with outbreaks.</p>                                                                                                                                                                                                                                                                                                                                                                                                                                                                 |
