# Supplementary material for: Drivers of COVID-19 Outcomes in Long-Term Care Facilities Using Multi-Level Analysis: A Systematic Review
Source: Healthcare (Basel). 2024 Apr 8;12(7):807. doi: 10.3390/healthcare12070807 (PMC11011537; doi:10.3390/healthcare12070807)
Supplement: Supplementary file 1 [file healthcare-12-00807-s001.zip]

Archive with 9 entries (9 files):
- S1. PRISMA Checklist..pdf
- Table S1. Search strategies..pdf
- Table S2. The methodological quality assessment of the included studies..pdf
- Table S3. Individual factors related to outbreaks..pdf
- Table S4. Individual factors related to COVID-19 related deaths..pdf
- Table S5. Organizational factors related to infection outbreaks..pdf
- Table S6. Organizational factors related to COVID-related deaths..pdf
- Table S7. Environmental factors related to COVID outbreaks..pdf
- Table S8. Environmental factors related to COVID-related deaths..pdf
